# Supplementary material for: Developing a Slow-Release Permanganate Composite for Degrading Aquaculture Antibiotics
Source: MDPI journal article supplement (doi:10.3390/antibiotics12061025), 2023-06-07
Supplement: s1 [file s1]

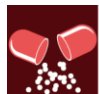

---

## Supplementary materials

---

### **Developing a slow-release permanganate composite for degrading aquaculture antibiotics**

Chainarong Sakulthaew <sup>1</sup>, Chanat Chokejaroenrat <sup>2\*</sup>, Sidaporn Panya <sup>2</sup>, Apisit Songsasen <sup>3</sup>, Kitipong Poomipuen <sup>1</sup>, Saksit Imman <sup>4</sup>, Nopparat Suriyachai <sup>4</sup>, Torpong Kreetachat <sup>4</sup> and Steve Comfort <sup>5</sup>

---

10 Figures

4 Tables

- 15 pages –

---

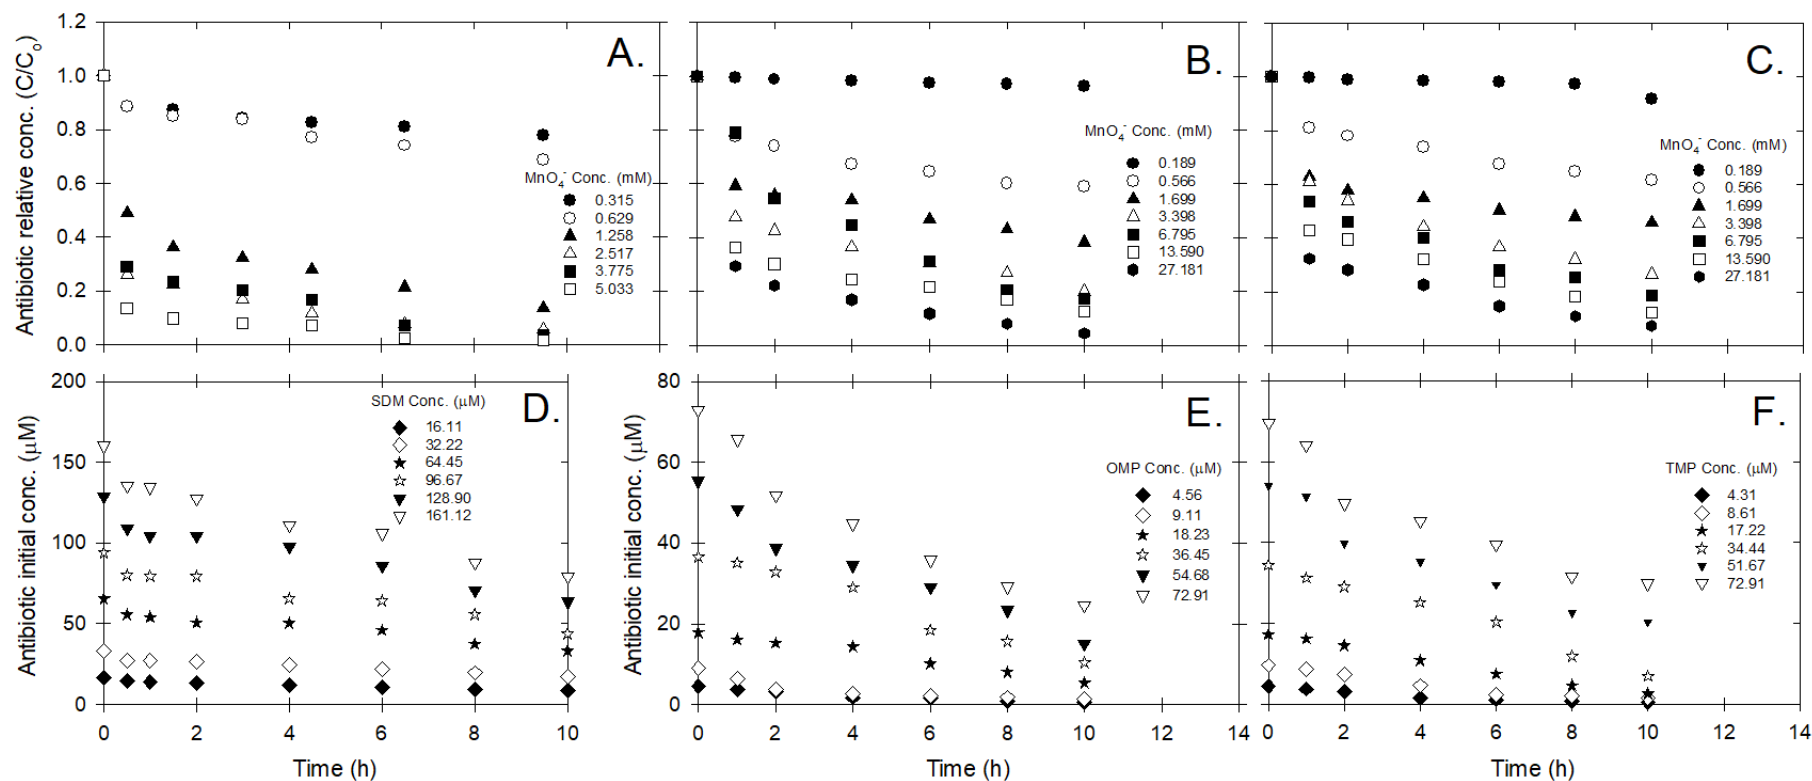

**Figure S1.** Temporal changes in antibiotic relative concentrations (A; Sulfadimethoxine, SDM 161.12 μM, B; Ormetoprim, OMP 36.45 μM, C; Trimethoprim, TMP 34.44 μM) following treatment with varying MnO<sub>4</sub><sup>-</sup> concentrations (0.315 to 5.033 mM for SDM or 0.189 to 27.181 mM for OMP or TMP) and loss of initial concentrations of antibiotics (D; SDM 16.11 to 161.12 μM, E; OMP 4.56 to 72.91 μM, F; TMP 4.56 to 72.91 μM) when treated with MnO<sub>4</sub><sup>-</sup> at 1.133 mM.

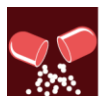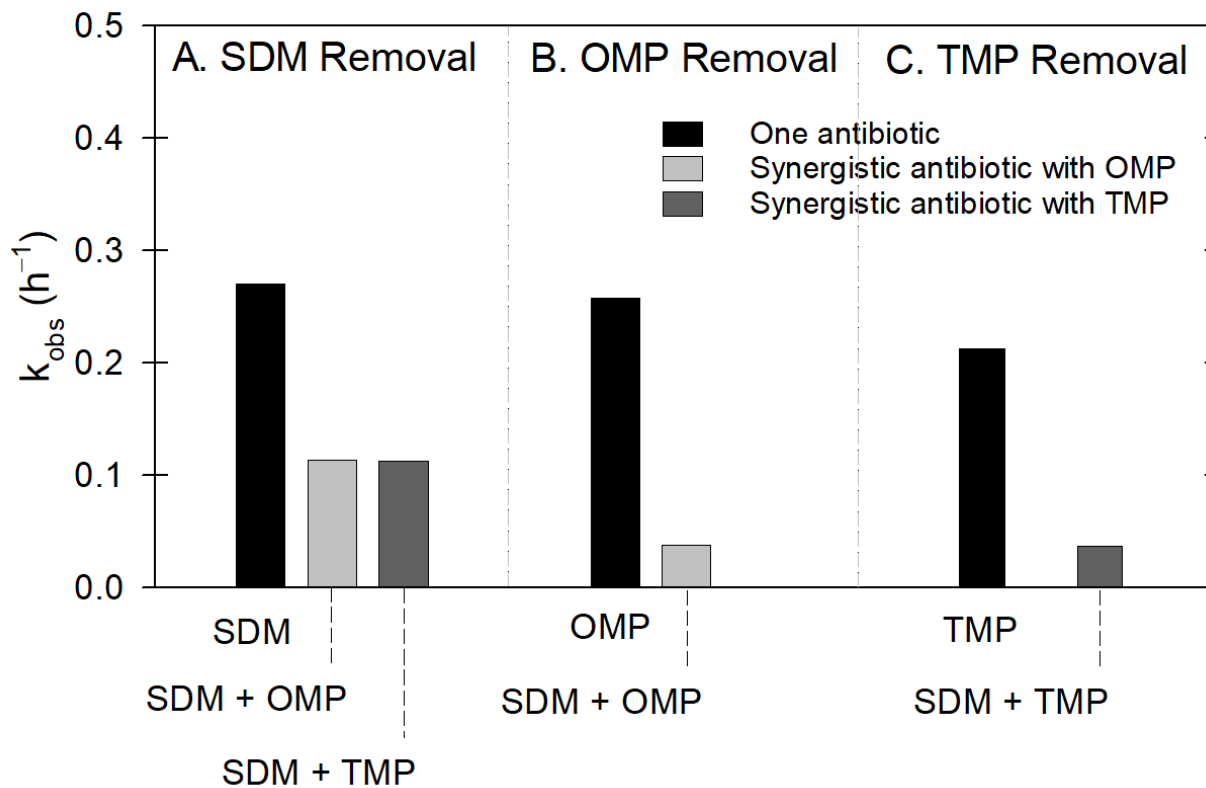

**Figure S2.** Observed kinetic rate constant ( $k_{obs}$ ) of each antibiotic degradation (A; Sul-fadimethoxine, SDM, B; Ormetoprim, OMP, or C; Trimethoprim, TMP) with presence of different synergetic antibiotics (as individual, SDM+OMP, or SDM+TMP) following treatment with  $MnO_4^-$  at  $180\text{ mg L}^{-1}$ .

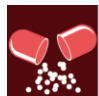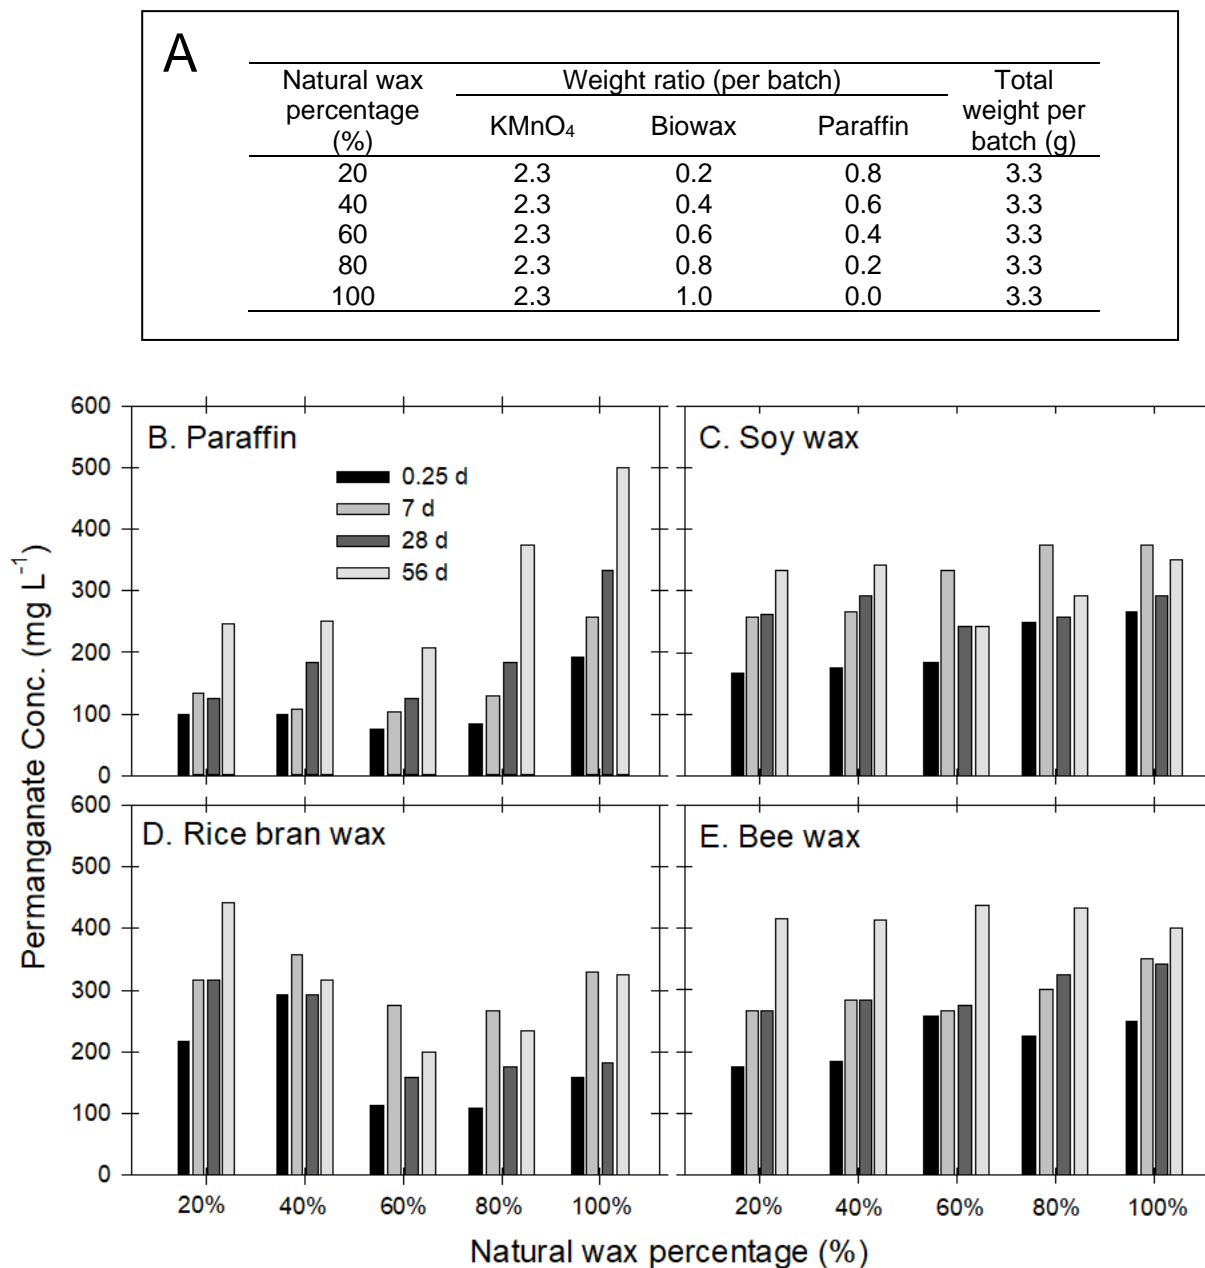

**Figure S3.** Permanganate release concentration [Mixing ratio: Set A]; **(A)** Weight composition of SR-MnO<sub>4</sub> per batch (3.3 g) at different natural wax percentages. **(B–E)** Permanganate concentrations of each type of SR-MnO<sub>4</sub> at different natural wax percentages (20–100%) and at different timelines (0.25, 7, 28, and 56d). Graphs **(B–E)** represent different types of natural wax in the mixture: **(B)** synthetic paraffin, **(C)** soy wax, **(D)** rice bran wax, and **(E)** beeswax.

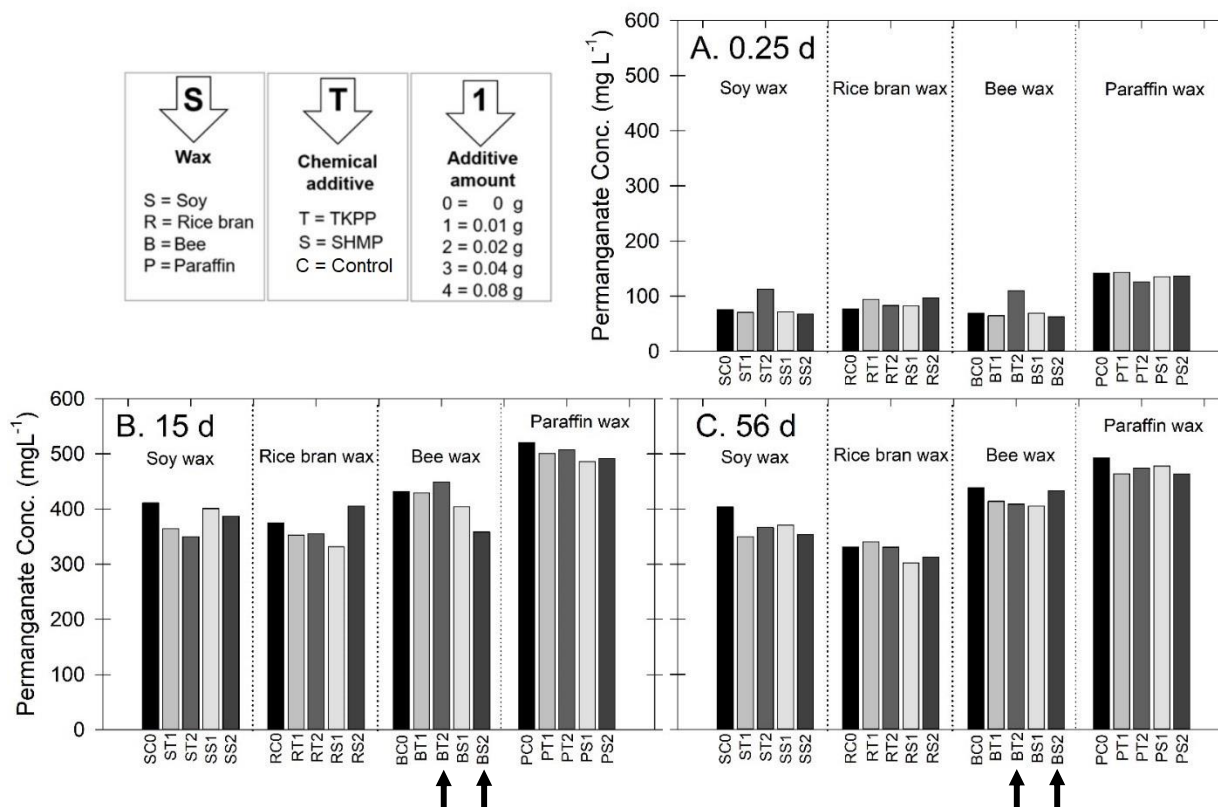

**Figure S4.** Permanganate concentrations of each type of SR-MnO<sub>4</sub><sup>-</sup> with different formulations of natural wax, synthetic paraffin, and chemical addition (TKPP or SHMP) for different timelines: (A) 0.25 day, (B) 15 day, and (C) 56 day.

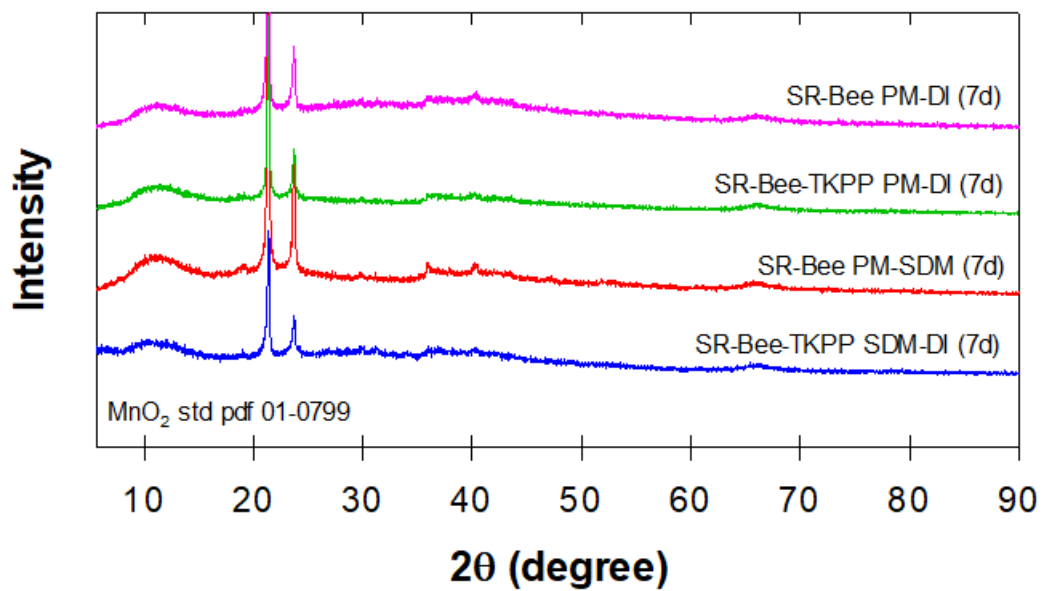

**Figure S5.** X-ray diffraction analysis of different types of slow-release beewax (SRB) before and after soaking in SDM solution for 7 d. (Bee: beewax, PM: permanganate, TKPP: Tetrapotassium pyrophosphate, SDM: Sulfadimethoxine, DI: distilled water)

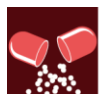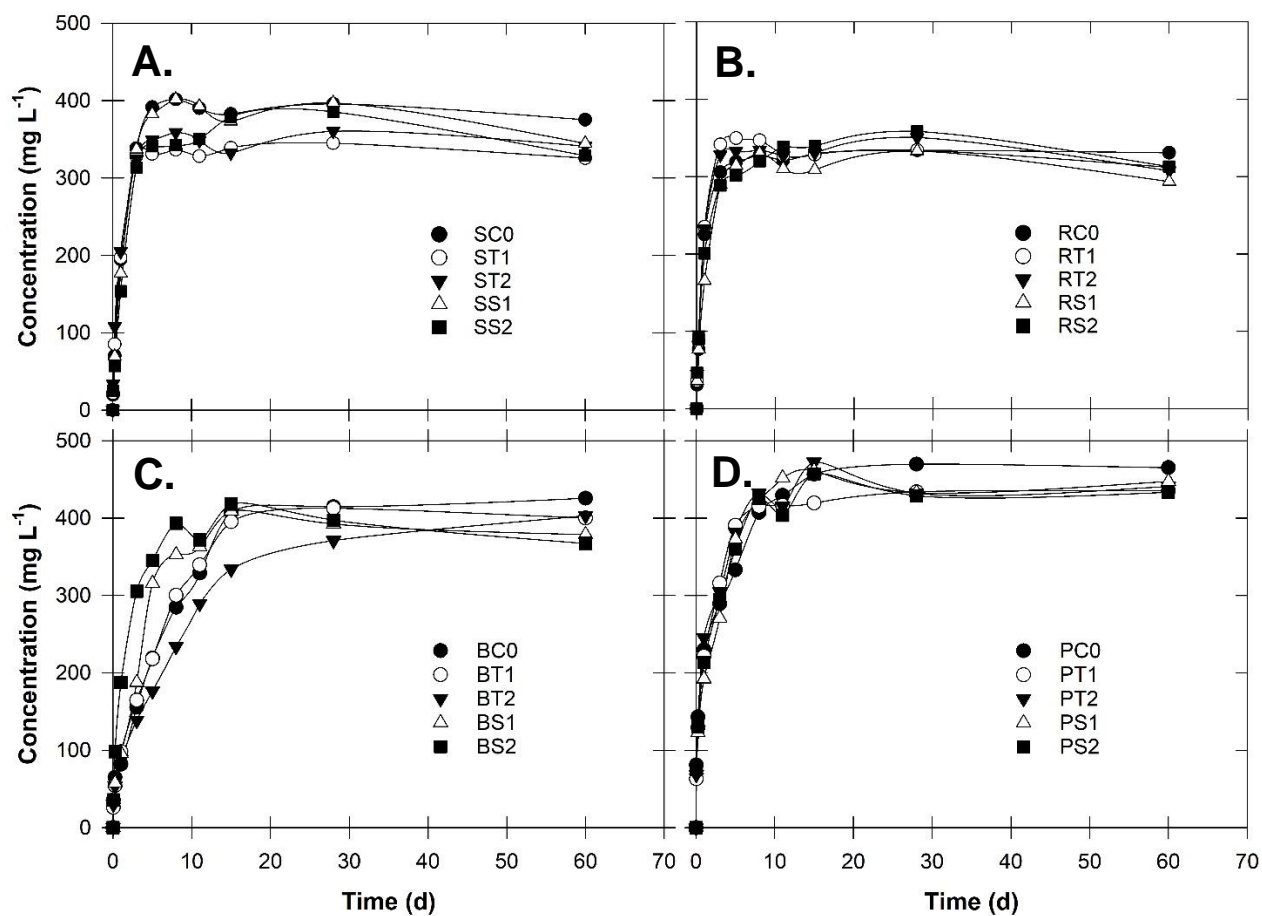

**Figure S6.** Temporal changes in  $MnO_4^-$  concentration from each type of SR- $MnO_4^-$ : (A) soy wax; (B) rice bran wax (C) beeswax; and (D) paraffin. The explanation of slow-release sample abbreviation (e.g., SC0, ST1, etc.) is provided in the Figure S4.

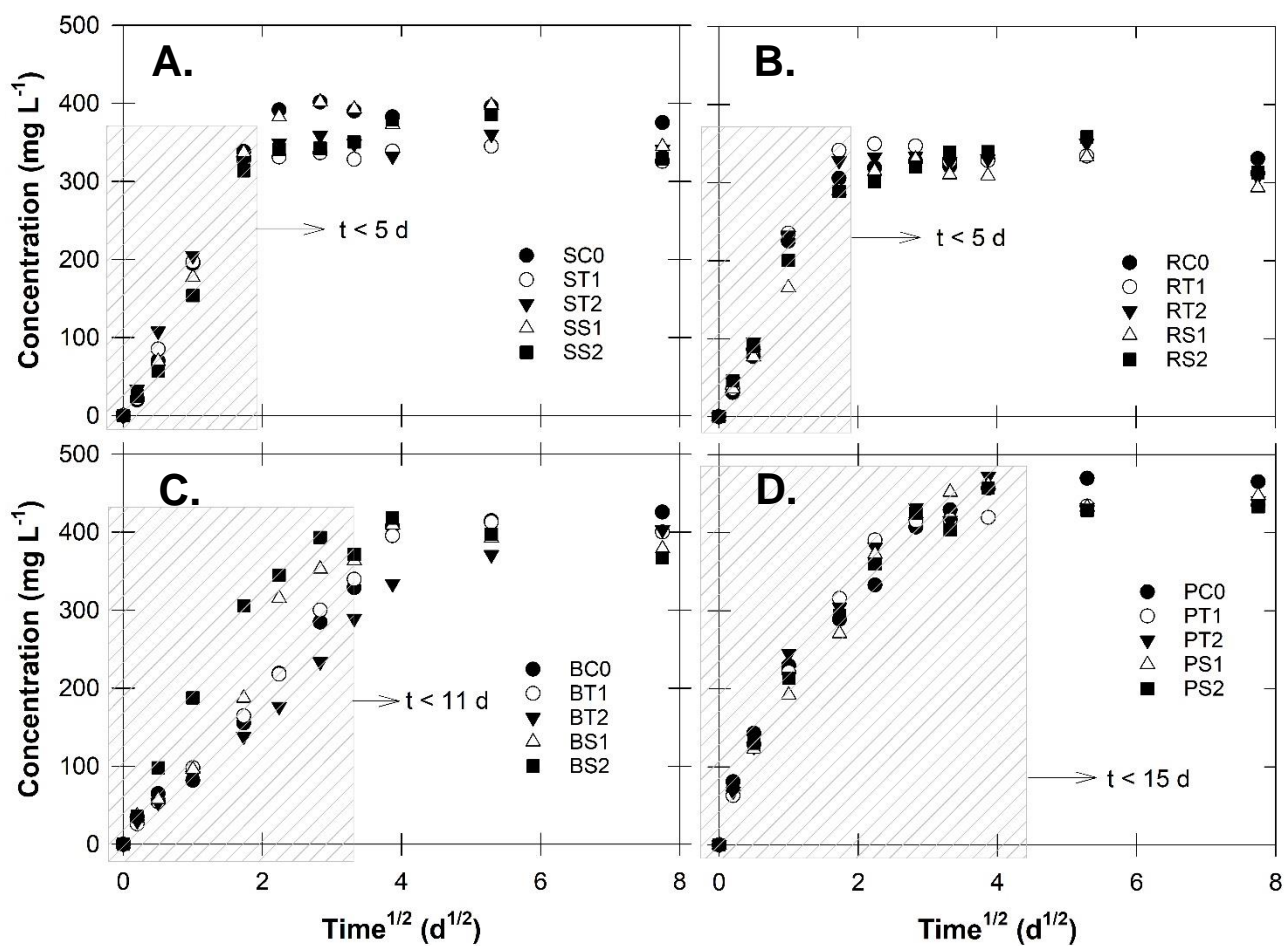

**Figure S7.** Release pattern of MnO<sub>4</sub><sup>-</sup> concentration of each type of SR-MnO<sub>4</sub><sup>-</sup> plotted for Higuchi releasing model with all selected data (t < 60 d): (A) soy wax; (B) rice bran wax (C) beeswax; and (D) paraffin. Hatched boxes represented range of time that data may be fitted in linear regression. The explanation of slow-release sample abbreviation (e.g., SC0, ST1, etc.) is provided in the Figure S4.



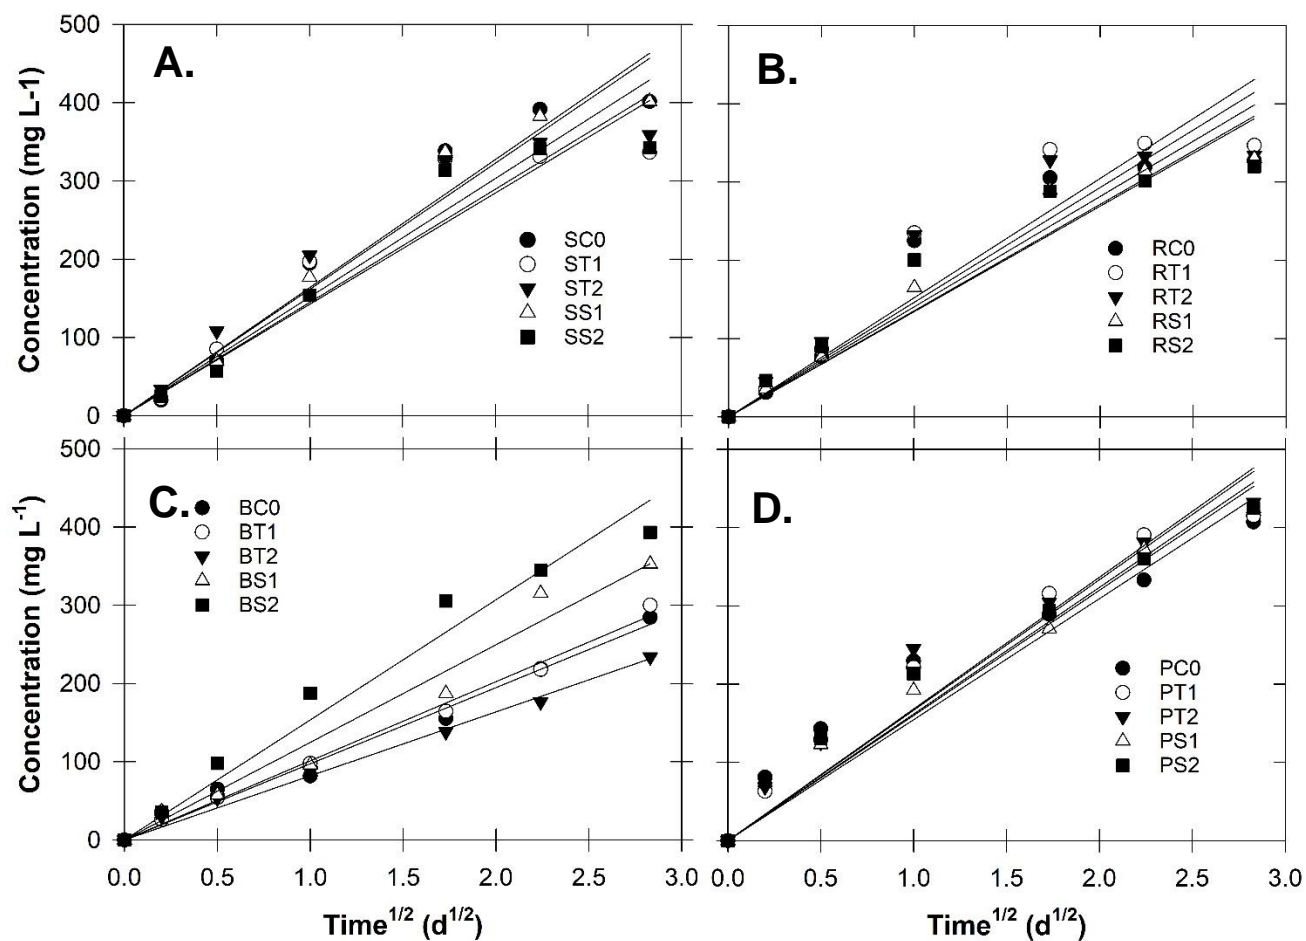

**Figure S8.** Linear regression of each type of SR-MnO<sub>2</sub> using Higuchi releasing model with selected data from  $t < 8$  d: **(A)** soy wax; **(B)** rice bran wax **(C)** beeswax; and **(D)** paraffin. The explanation of slow-release sample abbreviation (e.g., SC0, ST1, etc.) is provided in the Figure S4.

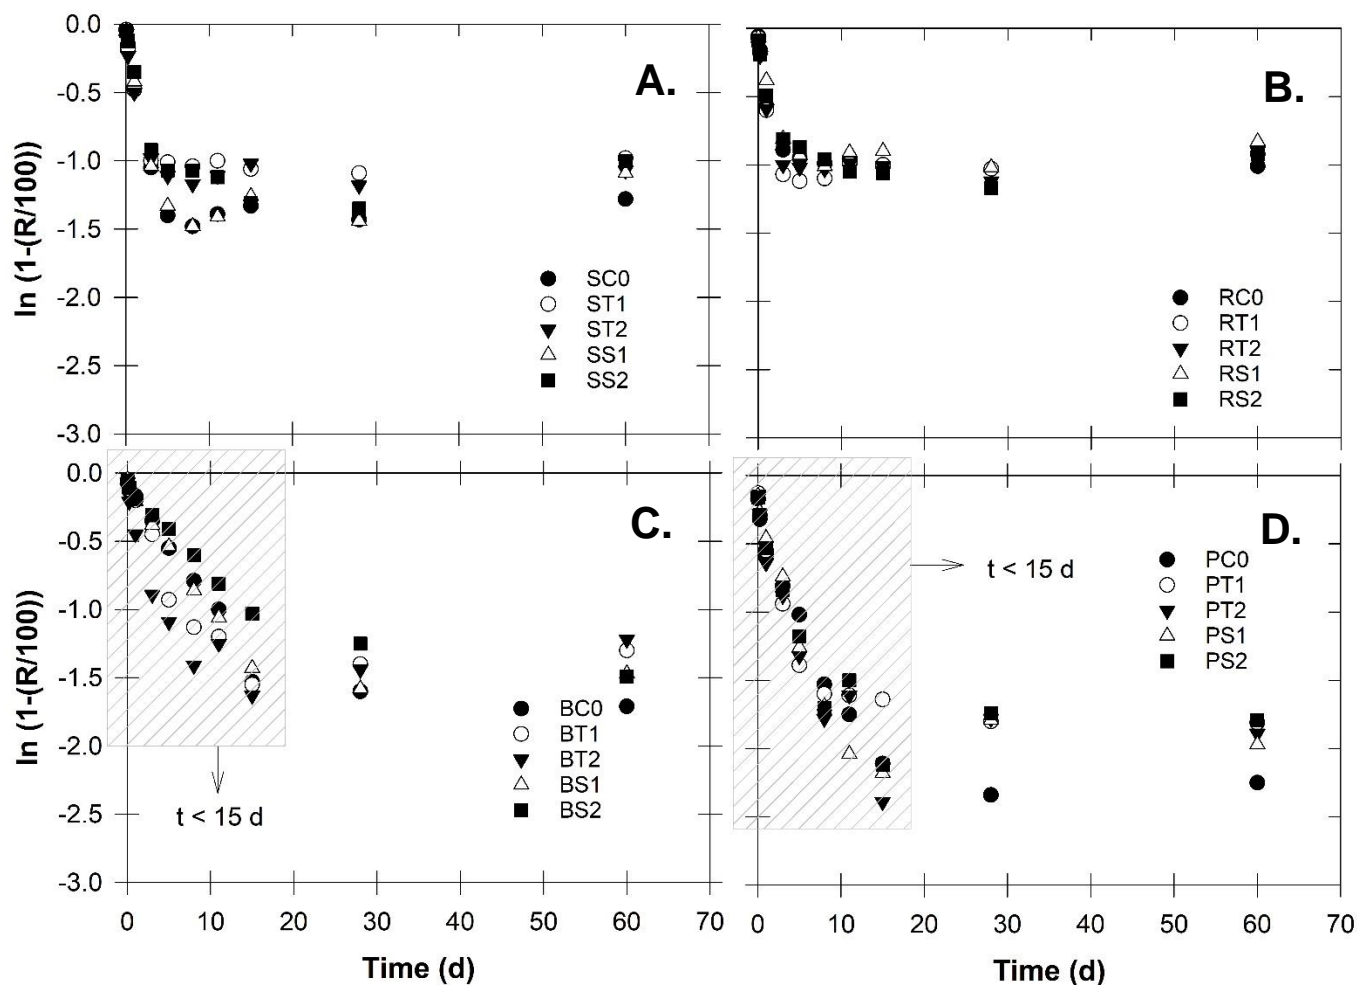

**Figure S9.** Release pattern of  $\text{MnO}_4^-$  concentration of each type of SR- $\text{MnO}_4^-$  plotted for Noyes-Whitney releasing model: **(A)** soy wax; **(B)** rice bran wax **(C)** beeswax; and **(D)** paraffin. Hatched boxes represent range of time that data may be fitted in linear regression. The explanation of slow-release sample abbreviation (e.g., SC0, ST1, etc.) is provided in the Figure S4.

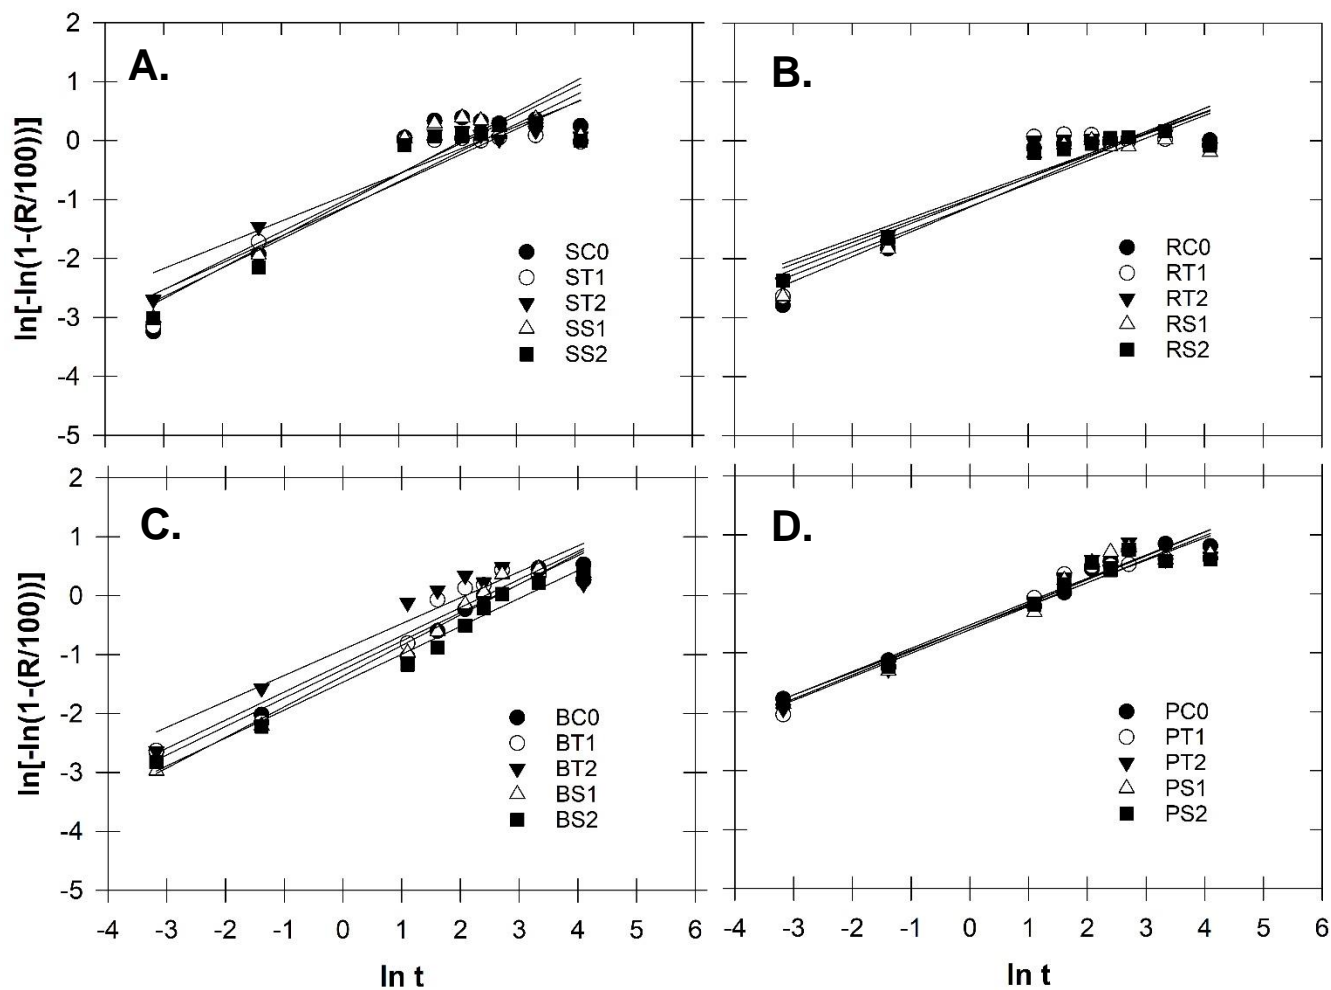

**Figure S10.** Linear regression of each type of slow-release permanganate using Weibul releasing model: (A) soy wax; (B) rice bran wax (C) beeswax; and (D) paraffin. The explanation of slow-release sample abbreviation (e.g., SC0, ST1, etc.) is provided in the Figure S4.

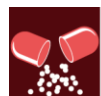

Table S1. Physicochemical characteristics of antibiotics.

| Antimicrobial;<br>Abbreviation<br>(CAS Number)       | Chemical Structure | Molecular<br>Formula                                            | MW<br>(g/mol) | Water<br>Solubility<br>at 25°C<br>(mg/L) | Henry's Con-<br>stant<br>(atm·m <sup>3</sup> ·mol <sup>-1</sup> ) | Log<br>K <sub>ow</sub> | pK <sub>a1</sub><br>(pK <sub>a2</sub> ) | Wavelength<br>(nm) |
|------------------------------------------------------|--------------------|-----------------------------------------------------------------|---------------|------------------------------------------|-------------------------------------------------------------------|------------------------|-----------------------------------------|--------------------|
| Sulfadimethox-<br>ine;SDM <sup>a</sup><br>(122-11-2) |                    | C <sub>12</sub> H <sub>14</sub> N <sub>4</sub> O <sub>4</sub> S | 310.33        | 343                                      | 1.30 × 10 <sup>-14</sup>                                          | 1.63                   | 2.4<br>(6.0)                            | 270 <sup>e</sup>   |
| Ormetoprim;<br>OMP <sup>a</sup><br>(6981-18-6)       |                    | C <sub>14</sub> H <sub>18</sub> N <sub>4</sub> O <sub>2</sub>   | 274.32        | 1,540                                    | 4.45 × 10 <sup>-13</sup>                                          | 1.23                   | 7                                       | 270 <sup>e</sup>   |
| Trimethoprim;<br>TMP <sup>b</sup><br>(738-70-5)      |                    | C <sub>14</sub> H <sub>18</sub> N <sub>4</sub> O <sub>3</sub>   | 290.32        | 400                                      | 1.32 × 10 <sup>-6</sup><br>(Vapor pres-<br>sure) <sup>c</sup>     | 0.91                   | 3.2<br>(6.7) <sup>d</sup>               | 230 <sup>e</sup>   |

References: <sup>a</sup>Sanders et al. [1]; <sup>b</sup>Straub, [2]; <sup>c</sup>Gros et al. [3]; <sup>d</sup>Qiang and Adams [4]; <sup>e</sup>Samuelsen et al. [5]

Table S2. Properties of TKPP and SHMP (Chokejaroenrat et al. [6])

| Chemical                                  | Molecular<br>Structure | Molecular<br>Formula                         | Description         | M.W.<br>(g mol <sup>-1</sup> ) | Density<br>(g cm <sup>-3</sup> ) | Solubility<br>(mg L <sup>-1</sup> ) | Manufacturer           |
|-------------------------------------------|------------------------|----------------------------------------------|---------------------|--------------------------------|----------------------------------|-------------------------------------|------------------------|
| Sodium hex-<br>ameta-phos-<br>phate(SHMP) |                        | (NaPO <sub>3</sub> ) <sub>6</sub>            | Dispersing<br>agent | 611.77                         | 2.484                            | Soluble                             | Sigma Aldrich          |
| Tetrapotassium<br>pyrophosphate<br>(TKPP) |                        | K <sub>4</sub> P <sub>2</sub> O <sub>7</sub> | Dispersing<br>agent | 330.34                         | -                                | Highly sol-<br>uble                 | Carus Corpo-<br>ration |



Table S3. Physicochemical properties of aquaculture discharge wastewater.

| Parameter                      | Unit                                 | Value  |
|--------------------------------|--------------------------------------|--------|
| pH                             | -                                    | 7.91   |
| Turbidity                      | NTU                                  | 84     |
| Conductivity                   | $\mu\text{S cm}^{-1}$                | 141    |
| Total kjeldahl nitrogen (TKN)  | $\text{mgL}^{-1}$                    | 7.68   |
| Nitrate                        | $\text{mgL}^{-1}$                    | 0.1    |
| Sulfate                        | $\text{mgL}^{-1}$                    | 6.03   |
| Chloride                       | $\text{mgL}^{-1}$                    | 110.83 |
| Phosphate                      | $\text{mg-P L}^{-1}$                 | 7.45   |
| Salinity                       | PSU                                  | 0.7    |
| Total phosphorus               | $\text{mgL}^{-1}$                    | 0.46   |
| Ammonia-nitrogen (mg/l)        | $\text{mgL}^{-1}$                    | 0.89   |
| Dissolved oxygen               | $\text{mgL}^{-1}$                    | 8.8    |
| Total alkalinity               | $\text{mgL}^{-1}$ as $\text{CaCO}_3$ | 31.6   |
| Total suspended solid          | $\text{mgL}^{-1}$                    | 282    |
| Total dissolve solid (TDS)     | $\text{mgL}^{-1}$                    | 147    |
| Total organic carbon (TOC)     | $\text{mg-C L}^{-1}$                 | 62.4   |
| Biological oxygen demand (BOD) | $\text{mgL}^{-1}$                    | 22.6   |
| Chemical oxygen demand (COD)   | $\text{mgL}^{-1}$                    | 225    |



**Table S4.** Weight composition of SR-MnO<sub>4</sub><sup>-</sup> with chemical addition (Tetrapotassium pyrophosphate, TKPP, or Sodium hexametaphosphate, SHMP) per SR (0.75 g) [Mixing ratio: Set B].

| SR-MnO <sub>4</sub> <sup>-</sup> | Weight ratio (per slow-release) (g) |                  |                  |                 |                 |
|----------------------------------|-------------------------------------|------------------|------------------|-----------------|-----------------|
|                                  | KMnO <sub>4</sub>                   | Biowax           | Paraffin         | TKPP            | SHMP            |
| XC0                              | 0.525<br>(70.0%)                    | 0.135<br>(18.0%) | 0.090<br>(12.0%) | -               | -               |
| XT1                              | 0.525<br>(70.0%)                    | 0.125<br>(16.7%) | 0.090<br>(12.0%) | 0.010<br>(0.0%) | -               |
| XT2                              | 0.525<br>(70.0%)                    | 0.115<br>(15.3%) | 0.090<br>(12.0%) | 0.020<br>(1.3%) | -               |
| XT3                              | 0.525<br>(70.0%)                    | 0.095<br>(12.7%) | 0.090<br>(12.0%) | 0.040<br>(2.7%) | -               |
| XT4                              | 0.525<br>(70.0%)                    | 0.055<br>(7.3%)  | 0.090<br>(12.0%) | 0.080<br>(5.3%) | -               |
| XS1                              | 0.525<br>(70.0%)                    | 0.135<br>(18.0%) | 0.090<br>(12.0%) | -               | 0.010<br>(0.0%) |
| XS2                              | 0.525<br>(70.0%)                    | 0.125<br>(16.7%) | 0.090<br>(12.0%) | -               | 0.020<br>(1.3%) |
| XS3                              | 0.525<br>(70.0%)                    | 0.115<br>(15.3%) | 0.090<br>(12.0%) | -               | 0.040<br>(2.7%) |
| XS4                              | 0.525<br>(70.0%)                    | 0.095<br>(12.7%) | 0.090<br>(12.0%) | -               | 0.080<br>(5.3%) |

**Remark**

1. First letter of each slow-release PM (X) represents the type of wax (P = paraffin; S = soy wax; R = rice bran, wax; B = Beeswax)
2. Percentages in parentheses were calculated based on amount of component in one slow-release PM (0.75 g).

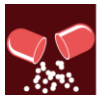

---

## Reference

- [1] Sanders, S.; Srivastava, P.; Feng, Y.; Dane, J.; Basile, J.; Barnett, M. Sorption of the Veterinary Antimicrobials Sulfadimethoxine and Ormetoprim in Soil. *Journal of environmental quality* **2008**, *37*, 1510-1518, doi:10.2134/jeq2007.0215.
- [2] Straub, J.O. An Environmental Risk Assessment for Human-Use Trimethoprim in European Surface Waters. *Antibiotics (Basel)* **2013**, *2*, 115-162, doi:10.3390/antibiotics2010115.
- [3] Gros, M.; Petrović, M.; Barceló, D. Development of a multi-residue analytical methodology based on liquid chromatography-tandem mass spectrometry (LC-MS/MS) for screening and trace level determination of pharmaceuticals in surface and wastewaters. *Talanta* **2006**, *70*, 678-690, doi:10.1016/j.talanta.2006.05.024.
- [4] Qiang, Z.; Adams, C. Potentiometric determination of acid dissociation constants (pKa) for human and veterinary antibiotics. *Water Research* **2004**, *38*, 2874-2890, doi:https://doi.org/10.1016/j.watres.2004.03.017.
- [5] Samuelsen, O.B.; Lunestad, B.T.; Ervik, A.; Fjelde, S. Stability of antibacterial agents in an artificial marine aquaculture sediment studied under laboratory conditions. *Aquaculture* **1994**, *126*, 283-290, doi:https://doi.org/10.1016/0044-8486(94)90044-2
- [6] Chokejaroenrat, C.; Comfort, S.; Sakulthaew, C.; Dvorak, B. Improving the treatment of non-aqueous phase TCE in low permeability zones with permanganate. *J. Hazard. Mater.* **2014**, *268*, 177-184, https://doi.org/10.1016/j.jhazmat.2014.01.007.
